# Supplementary material
Source: publisher site journal article supplement (https://www.dovepress.com/article/404813)
Supplement: Supplementary file 1 [file get_supplementary_file.php]

**Supplement Table 1.** Worldwidedistribution of VUS symptomatic *HTRA1* variant carriers

| Cases | Gender/ Onset age | Nationality | Clinical manifestations | Imaging | Accompanying diseases | Variants (NM_002775.5) | Exon | HtrA1 protease activity | ACMG criteria |
| --- | --- | --- | --- | --- | --- | --- | --- | --- | --- |
| Verdura 1 | M/56 | France | Cognitive impairment, gait disorders | WMHs, LIs | No | c.361A>C, p.S121R | Exon 1 | Normal 2 | VUS (PM2_Supporting+PP3) |
| Verdura 1 | M/50 | France | Seizures | WMHs, LIs | Hypertension | c.367G>T, p.A123S | Exon 1 | Normal 2 | VUS (PM2_Supporting) |
| Verdura 1 | F/58 | France | Migraine | WMHs | No | c.397C>G, p.R133G | Exon 1 | Normal 2 | VUS (PM2_Supporting) |
| Donato 3 | F/63 | Italy | Stroke, cognitive impairment, gait disorders, psychiatric disorders | WMHs | No | c.406A>G, p.S136G | Exon 1 | NA | VUS (PM2_Supporting) |
| Donato 3 | M/59 | Italy | Cognitive impairment, gait disorders | WMHs, CMBs | No | c.451C>A, p.Q151K | Exon 1 | NA | VUS (PM2_Supporting) |
| Pati 4 | M/59 | Italy | Cognitive impairment, gait disorders | WMHs, CMBs | Psoriatic arthritis | c.451C>A, p.Q151K | Exon 1 | NA | VUS (PM2_Supporting) |
| Zhang 5 | M/64 | China | Stroke, cognitive impairment, alopecia | WMHs, LIs, CMBs | Hypertension | c.527T>C, p.V176A | Exon 2 | NA | VUS (PM1+PM2_Supporting+PP3) |
| Grigaitė 6 | M/36 | Lithuanian | Stroke, cognitive impairment | WMHs, LIs, CMBs | Hypertension, dyslipidemia, smoking | c.533_535del, p.K178del | Exon 2 | NA | VUS (PM1+PM2_Supporting+PP3) |
| Donato 3 | M/55 | Italy | Cognitive impairment, gait disorders, psychiatric disorders | WMHs, LIs | Hypertension | c.617G>A, p.G206E | Exon 3 | NA | VUS (PM2_Supporting+PM5_Supporting) |
| Kono 7 | M/40 | Japan | Stroke, cognitive impairment, spine disorders, alopecia | WMHs, LIs, CMBs | Hypertension, dyslipidemia | c.646G>A, p.V216M | Exon 3 | NA | VUS (PM2_Supporting+PP3) |
| Yang 8 | F/39 | China | Cognitive impairment | WMHs, LIs | No | c.821G>A, p.R274Q | Exon 4 | NA | VUS (PM1+PM2_Supporting+PP3) |
| Zhang 9 | M/43 | China | Stroke, cognitive impairment, psychiatric disorders | WMHs, LIs, CMBs | No | c.824C>T, p.P275L | Exon 4 | NA | VUS (PM1+PM2_Supporting+PP3) |
| Chen10 | M/33 | China | Stroke, cognitive impairment, spine disorders, spine disorders, alopecia | WMHs, LIs, CMBs | No | c.824C>T, p.P275L | Exon 4 | NA | VUS (PM1+PM2_Supporting+PP3) |
| Wu 11 | M/45 | China | Stroke, cognitive impairment | WMHs, LIs, CMBs | No | c.836T>A, p.V279E | Exon 4 | NA | VUS (PM1+PM2_Supporting+PP3) |
| Oluwole 12 | M/32 | Gabonese Republic | Stroke, cognitive impairment, gait disorders, seizures | WMHs, LIs | Intramedullary syrinx | c.847G>A, p.G283R | Exon 4 | NA | VUS (PM1+PM2_Supporting+PM5) |
| Mönkäre 13 | F/55 | Finland | Cognitive impairment | NA | No | c.847G>A, p.G283R | Exon 4 | NA | VUS (PM1+PM2_Supporting+PM5) |
| Verdura 1 | F/62 | France | Stroke | WMHs, LIs, CMBs | No | c.850A>G, p.S284G | Exon 4 | ↓ 1/Normal 2 | VUS (PS3_Moderate+PM2_Supporting+PM5) |
| Kono 7 | M/30 | Japan | Stroke, cognitive impairment, spine disorders, alopecia | WMHs, LIs, CMBs | Dyslipidemia, impaired glucose tolerance | c.851G>A, p.S284N | Exon 4 | NA | VUS (PM1+PM2_Supporting+PM5) |
| Zhou14 | M/35 | China | Stroke, cognitive impairment, spine disorders, alopecia | WMHs, CMBs | dyslipidemia | c.920T>C, p.L307P | Exon 4 | NA | VUS (PM1+PM2_Supporting+PP3) |
| Zhu 15 | M/45 | China | Dizziness, stroke, cognitive impairment, alopecia | WMHs, LIs, CMBs | Psoriasis | c.1061C>T, p.A354V | Exon 6 | NA | VUS (PM2_Supporting+PP3) |
| Verdura 1 | M/68 | France | Stroke, cognitive impairment, gait disorders | WMHs, LIs | Hypertension | c.1348G>C, p.D450H | Exon 9 | ↓ 1/Normal 2 | VUS (PS3_Moderate+PM2_Supporting+PP3) |

**Abbreviations**: F, female; M, male; NA, not available; CMBs, cerebral microbleeds; LIs, lacunar infarctions; WMHs, white matter hyperintensities; ↓ The decrease in HtrA1 protease activity;ACMG, American College of Medical Genetics and Genomics; VUS, Variants of uncertain significance. **Note:** References cited in the column “HtrA1 protease activity” are those of the authors who have performed relevant validation.

**References**

1. Verdura E, Herve D, Scharrer E, et al. Heterozygous HTRA1 mutations are associated with autosomal dominant cerebral small vessel disease. *Brain* 2015;138(Pt 8):2347-58. doi: 10.1093/brain/awv155 [published Online First: 2015/06/13]

2. Uemura M, Nozaki H, Koyama A, et al. HTRA1 Mutations Identified in Symptomatic Carriers Have the Property of Interfering the Trimer-Dependent Activation Cascade. *Frontiers in neurology* 2019;10:693. doi: 10.3389/fneur.2019.00693

3. Di Donato I, Bianchi S, Gallus GN, et al. Heterozygous mutations of HTRA1 gene in patients with familial cerebral small vessel disease. *CNS Neurosci Ther* 2017;23(9):759-65. doi: 10.1111/cns.12722 [published Online First: 2017/08/07]

4. Pati AR, Battisti C, Taglia I, et al. A new case of autosomal dominant small vessel disease carrying a novel heterozygous mutation in HTRA1 gene: 2-year follow-up. *Neurol Sci* 2018;39(8):1479-81. doi: 10.1007/s10072-018-3294-5 [published Online First: 2018/03/17]

5. Zhang WY, Xie F, Lu PL. Two novel heterozygous HTRA1 mutations in two pedigrees with cerebral small vessel disease families. *Neurol Sci* 2018;39(3):497-501. doi: 10.1007/s10072-017-3231-z [published Online First: 2018/01/07]

6. Grigaitė J, Šiaurytė K, Audronytė E, et al. Novel In-Frame Deletion in HTRA1 Gene, Responsible for Stroke at a Young Age and Dementia-A Case Study. *Genes* 2021;12(12) doi: 10.3390/genes12121955 [published Online First: 2021/12/25]

7. Kono Y, Nishioka K, Li Y, et al. Heterozygous HTRA1 mutations with mimicking symptoms of CARASIL in two families. *Clin Neurol Neurosurg* 2018;172:174-76. doi: 10.1016/j.clineuro.2018.07.009 [published Online First: 2018/07/22]

8. Yang M, Li S, Liu J, et al. Pedigree study of hereditary small cerebral vascular disease caused by c. 821G>A heterozygous mutation of HtrA serine protease⁃1 gene. *Chin J Neurol* 2019;52(06):478-86. doi: 10.3760/cma.j.issn.1006⁃7876.2019.06.007

9. Zhang H, Qin X, Shi Y, et al. Genotype-phenotype correlations of heterozygous HTRA1-related cerebral small vessel disease: case report and systematic review. *Neurogenetics* 2021;22(3):187-94. doi: 10.1007/s10048-021-00646-5 [published Online First: 2021/05/09]

10. Chen MJ, Zhang Y, Luo WJ, et al. Identified novel heterozygous HTRA1 pathogenic variants in Chinese patients with HTRA1-associated dominant cerebral small vessel disease. *Frontiers in genetics* 2022;13:909131. doi: 10.3389/fgene.2022.909131 [published Online First: 2022/08/30]

11. Wu C, Chen L, Ke S. Novel Heterozygous HTRA1 Pathogenic Variant Found in a Chinese Family with Autosomal Dominant Cerebral Small Vessel Disease. *Annals of Indian Academy of Neurology* 2020;23(6):832-35. doi: 10.4103/aian.AIAN_74_20 [published Online First: 2021/03/11]

12. Oluwole OJ, Ibrahim H, Garozzo D, et al. Cerebral small vessel disease due to a unique heterozygous HTRA1 mutation in an African man. *Neurology Genetics* 2020;6(1):e382. doi: 10.1212/nxg.0000000000000382 [published Online First: 2020/02/12]

13. Mönkäre S, Kuuluvainen L, Schleutker J, et al. Genetic analysis reveals novel variants for vascular cognitive impairment. *Acta neurologica Scandinavica* 2022;146(1):42-50. doi: 10.1111/ane.13613 [published Online First: 2022/03/22]

14. Zhou H, Jiao B, Ouyang Z, et al. Report of two pedigrees with heterozygous HTRA1 variants-related cerebral small vessel disease and literature review. *Molecular genetics & genomic medicine* 2022;10(10):e2032. doi: 10.1002/mgg3.2032 [published Online First: 2022/08/11]

15. Zhu M, Zhou M, Hong D. Middle-aged male with episodic dizziness for 2 years and right limb weakness for 2 days -CADASIL 2. *Chin J Nerv Ment Dis* 2020;46(10):637-40. doi: 10.3969/j.issn.1002-0152.2020.10.01
